# Supplementary material
Source: PubMed Central journal article supplement (PMC4605856)
Supplement: NIHMS700393-supplement.pdf [file NIHMS700393-supplement.pdf]

## **Abbreviations**

PL, phospholipid(s)

sPLA<sub>2</sub>, secretory phospholipase A<sub>2</sub>

sPLA<sub>2</sub>-IIA, Group IIA secretory phospholipase A<sub>2</sub>
